# Supplementary material
Source: publisher site journal article supplement (https://www.dovepress.com/article/316223)
Supplement: Supplementary file 1 [file get_supplementary_file.php]

Table S1 Baseline characteristics of 4792 HCC cases.

| Characteristic                                                             | Value                                                  |
|----------------------------------------------------------------------------|--------------------------------------------------------|
| Age (years)                                                                | 56.42 ± 12.13                                          |
| Gender (male/female, %)                                                    | 4153 (86.67)/639 (13.33)                               |
| Hepatitis B surface antigen (+/-, %)                                       | 3563 (74.35)/770 (16.07)                               |
|                                                                            | Unknown 459 (9.58)                                     |
| Hepatitis C virus antibody (+/-, %)                                        | 129 (2.69)/4204 (87.73)                                |
|                                                                            | Unknown 459 (9.58)                                     |
| Child-Pugh classifications (A/B/C, %)                                      | 2209 (46.10)/57 (1.19)/1 (0.02)                        |
|                                                                            | Unknown 2525 (52.69)                                   |
| Platelet count (x10 <sup>9</sup> /L)                                       | 196.35 ± 96.09                                         |
|                                                                            | Unknown 178 (3.71)                                     |
| Albumin (mg/dL)                                                            | 41.24 ± 4.72                                           |
|                                                                            | Unknown 205 (4.30)                                     |
| Alanine aminotransferase (U/L)                                             | 46.48 ± 45.17                                          |
|                                                                            | Unknown 206 (4.30)                                     |
| Aspartate aminotransferase (U/L)                                           | 55.50 ± 60.32                                          |
|                                                                            | Unknown 4.7%                                           |
| Total bilirubin (umol/L)                                                   | 17.89 ± 24.90                                          |
|                                                                            | Unknown 205 (4.30)                                     |
| Prothrombin time (s)                                                       | 12.16 ± 1.24                                           |
|                                                                            | Unknown 2030 (42.36)                                   |
| Activated partial thromboplastin time (s)                                  | 27.87 ± 4.71                                           |
|                                                                            | Unknown 43.8%                                          |
| Tumor numbers (one/two/more than two, %)                                   | 1094 (22.83)/404 (8.43)/1651 (34.45)                   |
|                                                                            | Unknown 1643 (34.29)                                   |
| Tumor size (≤2.0 cm/2.1-5.0 cm/>5.0 cm, %)                                 | 544 (11.35)/1169 (24.39)/1297 (27.07)                  |
|                                                                            | Unknown 1782 (37.19)                                   |
| Presence vascular invasion (+/-, %)                                        | 423 (8.83)/3105 (64.80)                                |
|                                                                            | Unknown 1264 (26.38)                                   |
| Presence extrahepatic metastasis (+/-, %)                                  | 429 (8.95)/2936 (61.27)                                |
|                                                                            | Unknown 1427 (29.78)                                   |
| Barcelona Clinic Liver Cancer staging (A/B/C, %)                           | 1240 (25.88)/1235 (25.77)/725 (15.13)                  |
|                                                                            | Unknown 1592 (33.22)                                   |
| Presence of ascites (+/-, %)                                               | 164 (3.42)/3364 (70.20)                                |
|                                                                            | Unknown 1264 (26.38)                                   |
| Tumor differentiations (well/well-moderate/moderate/moderate poor/poor, %) | 255 (5.32)/589 (12.29)/875 (18.26)/85 (1.77)/80 (1.67) |
|                                                                            | Unknown 2908 (60.68)                                   |
| Treatments (radical/non-radical, %)                                        | 2379 (49.65)/2413 (50.35)                              |
| Pre-treatment AFP (<25 ng/ml/≥25 ng/ml, %)                                 | 1830 (38.19)/2962 (61.81)                              |
| Pre-treatment DCP (<40 mAU/ml/≥40 mAU/ml, %)                               | 981 (20.47)/3811 (79.53)                               |
| Progression-free survival (months)                                         | 8.03 ± 10.27                                           |
| Overall survival (months)                                                  | 11.52 ± 11.60                                          |

Data are presented as mean ± standard deviations or numbers with percentages in parentheses.

HCC, hepatocellular carcinoma; AFP, alpha-foetoprotein; DCP, des-gamma-carboxy prothrombin

Table S2 Cox univariate survival analysis of predictors of overall survival and progression-free survival in 4792 HCC patients after treatments

| Characteristic                                   | Categories    | Prognosis-free survival |                     |         | Overall survival |                     |         |
|--------------------------------------------------|---------------|-------------------------|---------------------|---------|------------------|---------------------|---------|
|                                                  |               | Events/Total            | HR (95% CI)         | P-value | Events/Total     | HR (95% CI)         | P-value |
| <b>Age (years)</b>                               | ≤65           | 1736/3584               | 1.0                 |         | 507/3584         | 1.0                 |         |
|                                                  | >65           | 545/1208                | 0.885 (0.804-0.974) | 0.013   | 177/1208         | 1.035 (0.873-1.229) | 0.690   |
| <b>Sex</b>                                       | Female        | 262/639                 | 1.0                 |         | 70/639           | 1.0                 |         |
|                                                  | Male          | 2019/4153               | 1.194 (1.050-1.358) | 0.007   | 614/4153         | 1.338 (1.045-1.714) | 0.021   |
| <b>Presence hepatitis B surface antigen</b>      | No            | 334/770                 | 1.0                 |         | 106/770          | 1.0                 |         |
|                                                  | Yes           | 1769/3563               | 1.018 (0.905-1.144) | 0.770   | 506/3563         | 0.925 (0.750-1.140) | 0.460   |
| <b>Albumin (mg/dL)</b>                           | >35.0         | 1931/4101               | 1.0                 |         | 529/4101         | 1.0                 |         |
|                                                  | ≤35.0         | 244/486                 | 1.947 (1.703-2.226) | <0.001  | 113/486          | 2.779 (2.265-3.409) | <0.001  |
| <b>Presence of ascites</b>                       | No            | 1609/3364               | 1.0                 |         | 453/3364         | 1.0                 |         |
|                                                  | Yes           | 81/164                  | 2.125 (1.698-2.659) | <0.001  | 43/164           | 3.231 (2.359-4.426) | <0.001  |
| <b>Total bilirubin (umol/L)</b>                  | <34.2         | 2073/4338               | 1.0                 |         | 594/4338         | 1.0                 |         |
|                                                  | 34.2-51.3     | 68/148                  | 1.440 (1.131-1.834) | 0.003   | 27/148           | 1.913 (1.300-2.814) | <0.001  |
|                                                  | >51.3         | 34/101                  | 2.293 (1.631-3.223) | <0.001  | 21/101           | 3.789 (2.446-5.871) | <0.001  |
| <b>Prothrombin time (s)</b>                      | <14.0         | 1100/2608               | 1.0                 |         | 334/2608         | 1.0                 |         |
|                                                  | ≥14.0         | 51/154                  | 1.120 (0.846-1.483) | 0.430   | 26/154           | 1.870 (1.254-2.788) | 0.002   |
| <b>Activated partial thromboplastin time (s)</b> | 32.0-43.0     | 165/382                 | 1.0                 |         | 63/382           | 1.0                 |         |
|                                                  | <32.0         | 979/2356                | 0.836 (0.709-0.986) | 0.034   | 296/2356         | 0.693 (0.528-0.910) | 0.008   |
|                                                  | >43.0         | 7/23                    | 1.156 (0.542-2.463) | 0.708   | 1/23             | 0.377 (0.052-2.719) | 0.333   |
| <b>Tumor numbers</b>                             | One           | 412/1094                | 1.0                 |         | 107/1094         | 1.0                 |         |
|                                                  | Two           | 170/404                 | 1.129 (0.944-1.350) | 0.180   | 37/404           | 0.949 (0.653-1.379) | 0.780   |
|                                                  | More than two | 945/1651                | 2.046 (1.821-2.298) | <0.001  | 300/1651         | 2.153 (1.726-2.685) | <0.001  |
| <b>Tumor size (cm)</b>                           | ≤2            | 203/544                 | 1.0                 |         | 39/544           | 1.0                 |         |
|                                                  | 2.1-5.0       | 458/1169                | 0.925 (0.784-1.091) | 0.360   | 72/1169          | 0.787 (0.533-1.163) | 0.230   |
|                                                  | >5.0          | 791/1297                | 1.942 (1.664-2.267) | <0.001  | 309/1297         | 3.680 (2.637-5.135) | <0.001  |
| <b>Presence vascular invasion</b>                | No            | 1428/3105               | 1.0                 |         | 383/3105         | 1.0                 |         |
|                                                  | Yes           | 262/423                 | 2.426 (2.124-2.770) | <0.001  | 113/423          | 3.140 (2.542-3.878) | <0.001  |
| <b>Presence extrahepatic metastasis</b>          | No            | 1337/2936               | 1.0                 |         | 346/2936         | 1.0                 |         |
|                                                  | Yes           | 280/429                 | 2.406 (2.113-2.740) | <0.001  | 116/429          | 3.171 (2.567-3.917) | <0.001  |
| <b>Pre-treatment AFP (ng/ml)</b>                 | <25           | 700/1830                | 1.0                 |         | 163/1830         | 1.0                 |         |
|                                                  | ≥25           | 1581/2962               | 1.704 (1.558-1.863) | <0.001  | 521/2962         | 2.165 (1.815-2.581) | <0.001  |
| <b>Pre-treatment DCP (mAU/ml)</b>                | <40           | 314/981                 | 1.0                 |         | 54/981           | 1.0                 |         |
|                                                  | ≥40           | 1967/3811               | 1.984 (1.761-2.236) | <0.001  | 630/3811         | 3.254 (2.464-4.297) | <0.001  |

HCC, hepatocellular carcinoma; HR, hazard ratio; CI, confidence interval; AFP, alpha-fetoprotein; DCP, des-gamma-carboxy prothrombin.

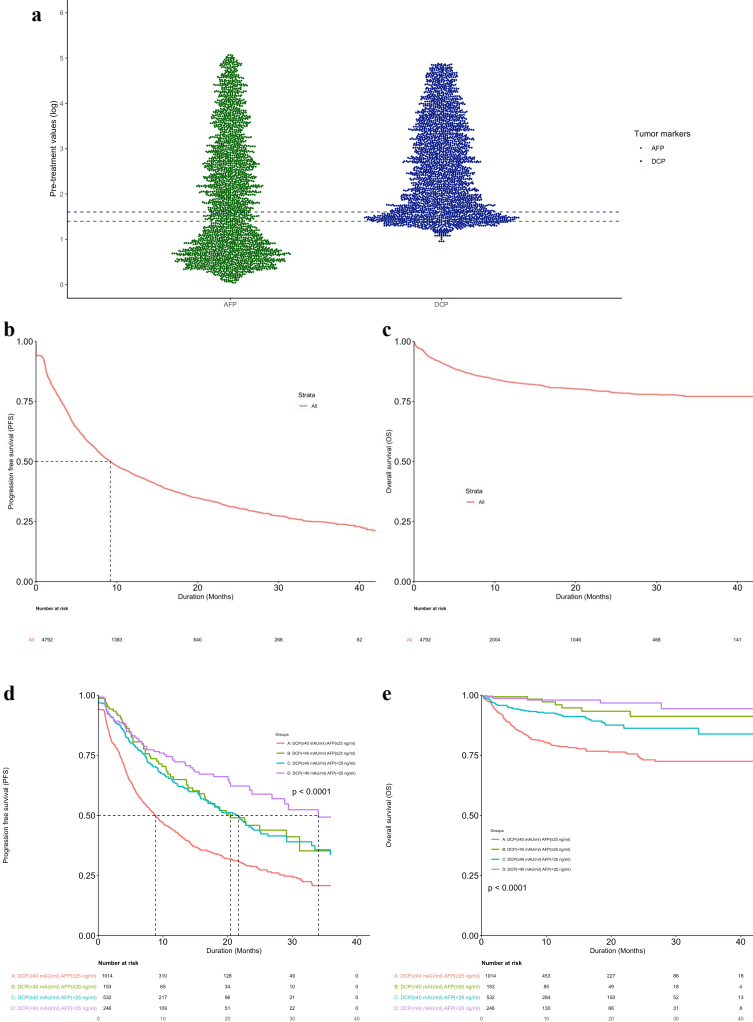

**Figure S1** Log-transformed alpha-fetoprotein (AFP) and des-gamma-carboxyprothrombin (DCP) levels before treatments **a**. Progression-free survival (PFS) **b** and overall survival (OS) **c** curves of enrolled 4792 hepatocellular carcinoma (HCC) patients, and PFS **d** and OS **e** curves of grouped HCC patients that enrolled in the multivariate cox regression models based on the pre-treated AFP and DCP. Reference dashed lines were drawn in terms of diagnostic cut-off values for AFP [log(25)] and DCP [log(40)] in corresponding colours, respectively **a**. Group A, AFP $\geq 25$  ng/ml, DCP $\geq 40$  mAU/ml; Group B, AFP $\geq 25$  ng/ml, DCP $< 40$  mAU/ml; Group C, AFP $< 25$  ng/ml, DCP $\geq 40$  mAU/ml; Group D, AFP $< 25$  ng/ml, DCP $< 40$  mAU/ml, **d** and **e**.

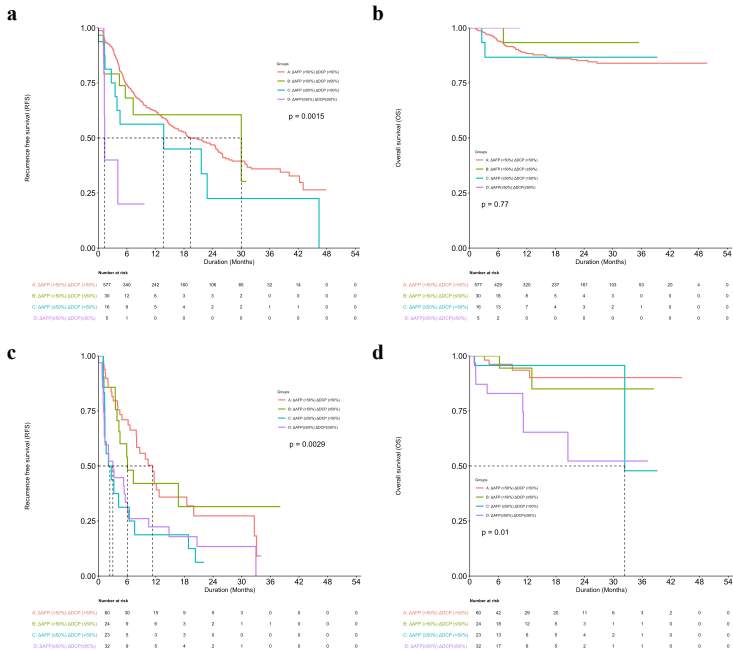

**Figure S2** Recurrence-free survival (RFS) **a, c** and overall survival (OS) **b, d** curves regarding alpha-fetoprotein (AFP) and des-gamma-carboxyprothrombin (DCP) response rates of hepatocellular carcinoma patients who received resection **a, b** or ablation **c, d**. Group A, AFP response >50%, DCP response >50%; Group B, AFP response >50%, DCP response ≤50%; Group C, AFP response ≤50%, DCP response >50%; Group D, AFP response ≤50%, DCP response ≤50%.

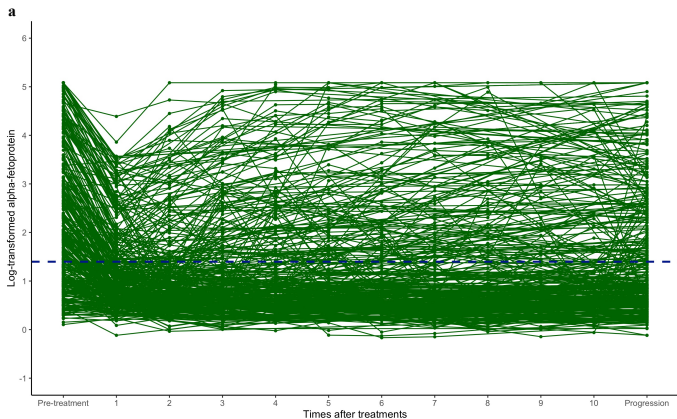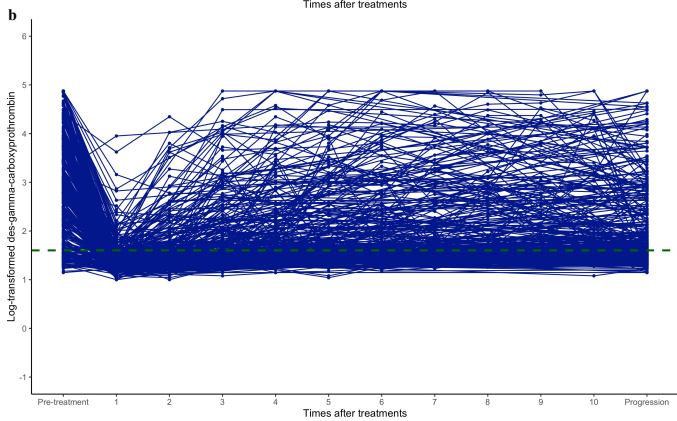

**Figure S3** Log-transformed alpha-fetoprotein (AFP) **a** and des-gamma-carboxyprothrombin (DCP) **b** each follow-up after the first treatment among patients who were progressed at the last follow-up. Reference dashed lines were drawn in terms of diagnostic cut-off values for AFP [ $\log(25)$ ] and DCP [ $\log(40)$ ] in corresponding plots **a** and **b**, respectively.

## Hazard ratio

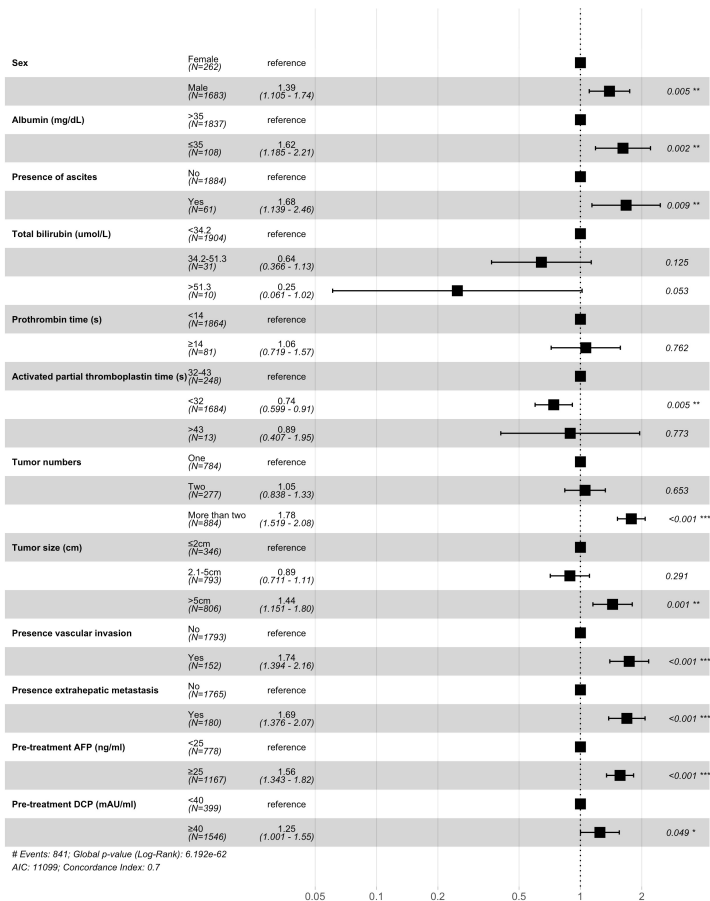

Figure S4 Forest plots from multivariate Cox regression models of overall survival.
